# Supplementary material for: A Bibliometric Analysis of Research on Temporomandibular Joint Disc Displacement from 1992 to 2022
Source: MDPI journal article supplement (doi:10.3390/healthcare11142108), 2023-07-24
Supplement: s1 [file s1]

**Table S2.** Analysis of 38 countries with more than five relevant publications in TMJ disc displacement.

| Rank | Country        | Documents | Citations | Average Citations |
|------|----------------|-----------|-----------|-------------------|
| 1    | USA            | 314       | 9853      | 31.38             |
| 2    | Japan          | 293       | 5983      | 20.42             |
| 3    | PRC            | 227       | 2520      | 11.10             |
| 4    | Brazil         | 175       | 2617      | 14.95             |
| 5    | Turkey         | 137       | 1727      | 12.61             |
| 6    | Italy          | 103       | 1965      | 19.08             |
| 7    | Germany        | 102       | 1917      | 18.79             |
| 8    | South Korea    | 77        | 1074      | 13.95             |
| 9    | Sweden         | 72        | 2544      | 35.33             |
| 10   | Austria        | 72        | 1866      | 25.92             |
| 11   | Canada         | 55        | 1773      | 32.24             |
| 12   | Spain          | 52        | 965       | 18.56             |
| 13   | Egypt          | 46        | 487       | 10.59             |
| 14   | Netherlands    | 43        | 1297      | 30.16             |
| 15   | Poland         | 33        | 278       | 8.42              |
| 16   | India          | 29        | 132       | 4.55              |
| 17   | Switzerland    | 27        | 537       | 19.89             |
| 18   | Australia      | 27        | 465       | 17.22             |
| 19   | Norway         | 25        | 785       | 31.40             |
| 20   | Denmark        | 24        | 817       | 34.04             |
| 21   | France         | 23        | 265       | 11.52             |
| 22   | UK             | 22        | 496       | 22.55             |
| 23   | Saudi Arabia   | 20        | 107       | 5.35              |
| 24   | Croatia        | 19        | 143       | 7.53              |
| 25   | Singapore      | 17        | 507       | 29.82             |
| 26   | Romania        | 17        | 103       | 6.06              |
| 27   | Finland        | 14        | 447       | 31.93             |
| 28   | Chile          | 14        | 254       | 18.14             |
| 29   | Israel         | 13        | 381       | 29.31             |
| 30   | Portugal       | 11        | 270       | 24.55             |
| 31   | Iran           | 11        | 94        | 8.55              |
| 32   | Thailand       | 10        | 147       | 14.70             |
| 33   | Belgium        | 9         | 269       | 29.88             |
| 34   | Czech Republic | 7         | 98        | 14.00             |
| 35   | Greece         | 6         | 166       | 27.67             |
| 36   | Slovakia       | 6         | 46        | 7.67              |
| 37   | Yemen          | 5         | 169       | 33.80             |
| 38   | Serbia         | 5         | 61        | 12.20             |
