# Supplementary material for: A Bibliometric Analysis of Research on Temporomandibular Joint Disc Displacement from 1992 to 2022
Source: MDPI journal article supplement (doi:10.3390/healthcare11142108), 2023-07-24
Supplement: s1 [file s1]

**Table S1.** Number of publications and citations in TMJ disc displacement per year from 1992 to 2022.

| <b>Year</b> | <b>Publication</b> | <b>Citation</b> |
|-------------|--------------------|-----------------|
| 1992        | 22                 | 7               |
| 1993        | 22                 | 16              |
| 1994        | 21                 | 40              |
| 1995        | 35                 | 74              |
| 1996        | 34                 | 144             |
| 1997        | 31                 | 133             |
| 1998        | 40                 | 226             |
| 1999        | 40                 | 273             |
| 2000        | 47                 | 339             |
| 2001        | 55                 | 447             |
| 2002        | 54                 | 541             |
| 2003        | 57                 | 683             |
| 2004        | 52                 | 590             |
| 2005        | 56                 | 668             |
| 2006        | 53                 | 858             |
| 2007        | 58                 | 999             |
| 2008        | 47                 | 1001            |
| 2009        | 57                 | 1117            |
| 2010        | 56                 | 1139            |
| 2011        | 50                 | 1233            |
| 2012        | 68                 | 1519            |
| 2013        | 74                 | 1758            |
| 2014        | 64                 | 1645            |
| 2015        | 64                 | 1814            |
| 2016        | 75                 | 1915            |
| 2017        | 74                 | 1840            |
| 2018        | 97                 | 2237            |
| 2019        | 104                | 2303            |
| 2020        | 129                | 3220            |
| 2021        | 124                | 3460            |
| 2022        | 122                | 3471            |
